CORRECTION

# Correction: A Computational Framework for 3D Mechanical Modeling of Plant Morphogenesis with Cellular Resolution

The PLOS Computational Biology Staff

There are some errors in Equations 11 and 20.

Equation 11 should be replaced by the following:

$$\mathbf{L}_g = \dot{\mathbf{F}}_g \cdot \mathbf{F}_g^{-1}$$

Equation 20 should be replaced by the following:

$$\Theta(\mathbf{A}) = \mathbf{P}_A \theta(\mathbf{P}_A^T \mathbf{A} \mathbf{P}_A) \mathbf{P}_A^T$$

where  $\mathbf{P}_A$  is the change-of-basis matrix from  $\mathbf{A}$  to the basis of eigenvectors of tensor  $\mathbf{A}$  and:

$$\theta[\mathbf{A}]_{ij} = \begin{cases} 0 & \text{if } A_{ij} \leq 0 \\ A_{ij} & \text{if } A_{ij} > 0 \end{cases}$$

The authors confirm that the errors do not affect the results of the paper.

## Reference

1. Boudon F, Chopard J, Ali O, Gilles B, Hamant O, Boudaoud A, et al. (2015) A Computational Framework for 3D Mechanical Modeling of Plant Morphogenesis with Cellular Resolution. PLoS Comput Biol 11(1): e1003950. doi: [10.1371/journal.pcbi.1003950](https://doi.org/10.1371/journal.pcbi.1003950) PMID: [25569615](https://pubmed.ncbi.nlm.nih.gov/25569615/)

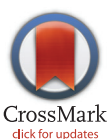

## OPEN ACCESS

**Citation:** The PLOS Computational Biology Staff (2016) Correction: A Computational Framework for 3D Mechanical Modeling of Plant Morphogenesis with Cellular Resolution. PLoS Comput Biol 12(7): e1005027. doi:10.1371/journal.pcbi.1005027

**Published:** July 8, 2016

**Copyright:** © 2016 The PLOS Computational Biology Staff. This is an open access article distributed under the terms of the [Creative Commons Attribution License](https://creativecommons.org/licenses/by/4.0/), which permits unrestricted use, distribution, and reproduction in any medium, provided the original author and source are credited.
